# Supplementary material
Source: PubMed Central journal article supplement (PMC5551977)
Supplement: NIHMS885857-supplement-FigS1.pdf [file NIHMS885857-supplement-FigS1.pdf]

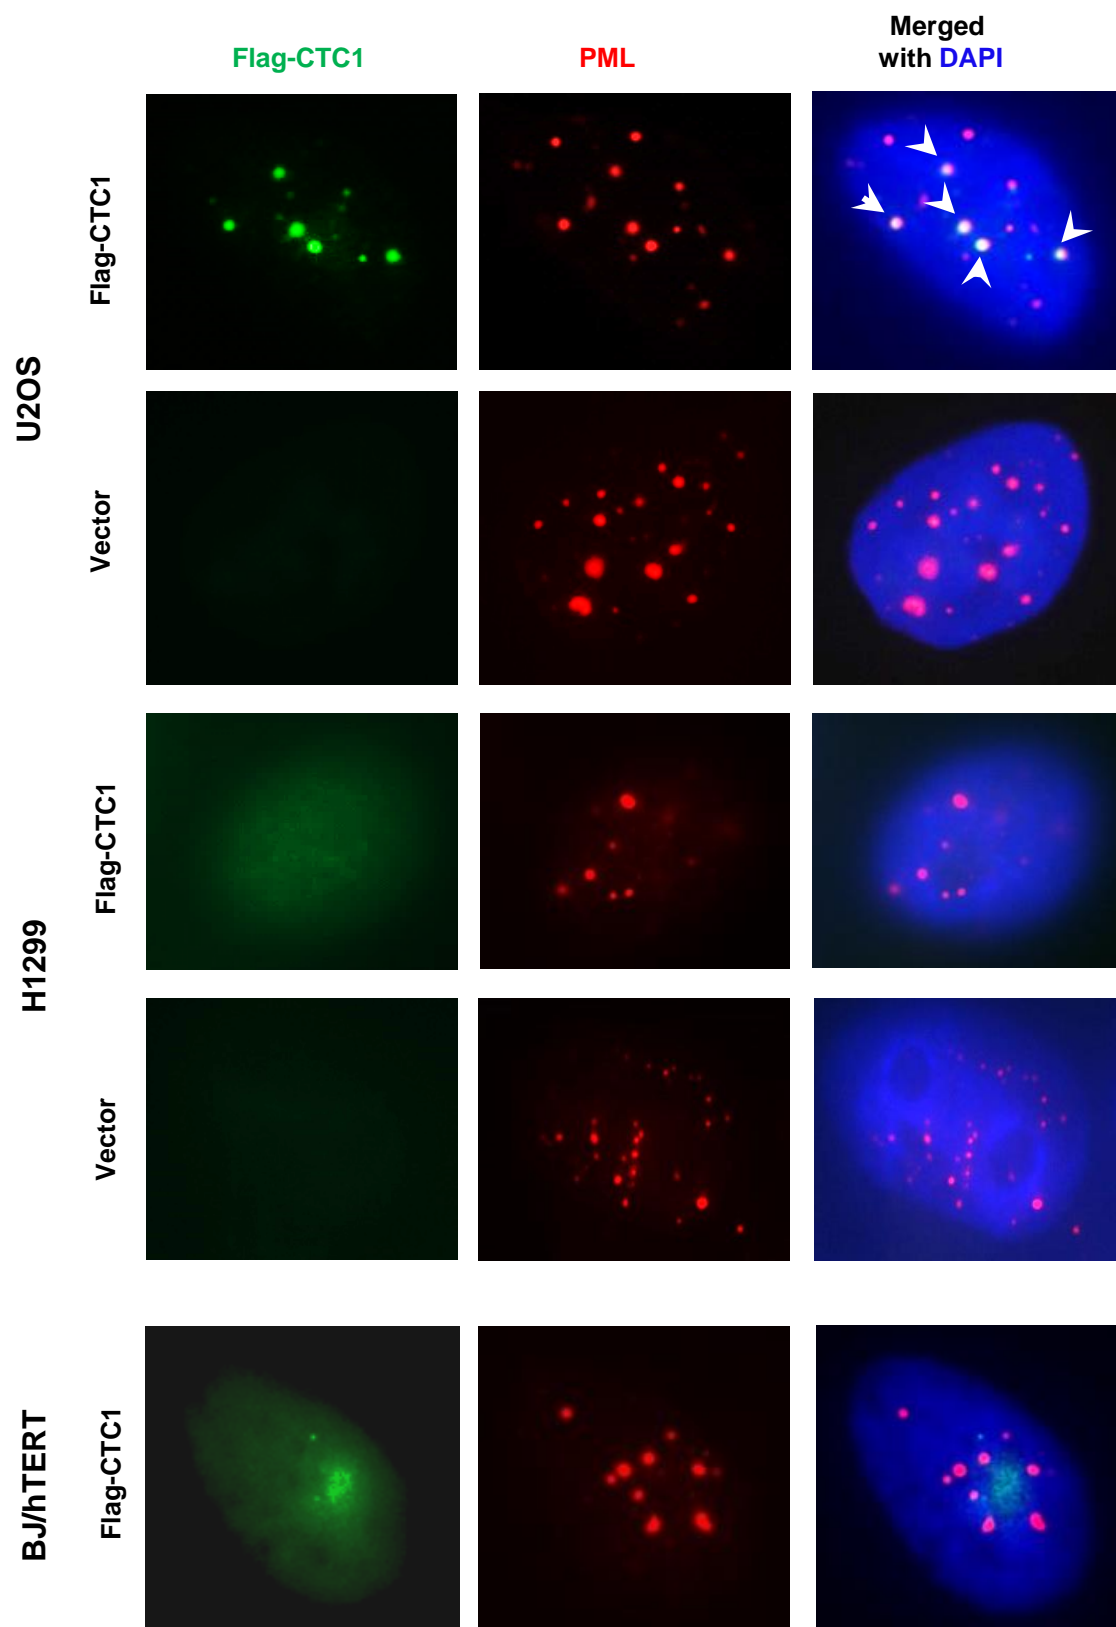

**Supplemental Fig S1. CTC1 formed punctuate nuclear staining complex colocalizing with PML in ALT but not in non-ALT cells.** Cells were permeabilized with Triton X-100 for 5 min on ice prior to fixation to help reveal CTC1 foci. Cells were then co-stained with anti-Flag and anti-PML antibodies. Arrows indicate Flag-CTC1 and PML colocalizations.
