# Supplementary material
Source: PubMed Central journal article supplement (PMC5551977)
Supplement: NIHMS885857-supplement-FigS2.pdf [file NIHMS885857-supplement-FigS2.pdf]

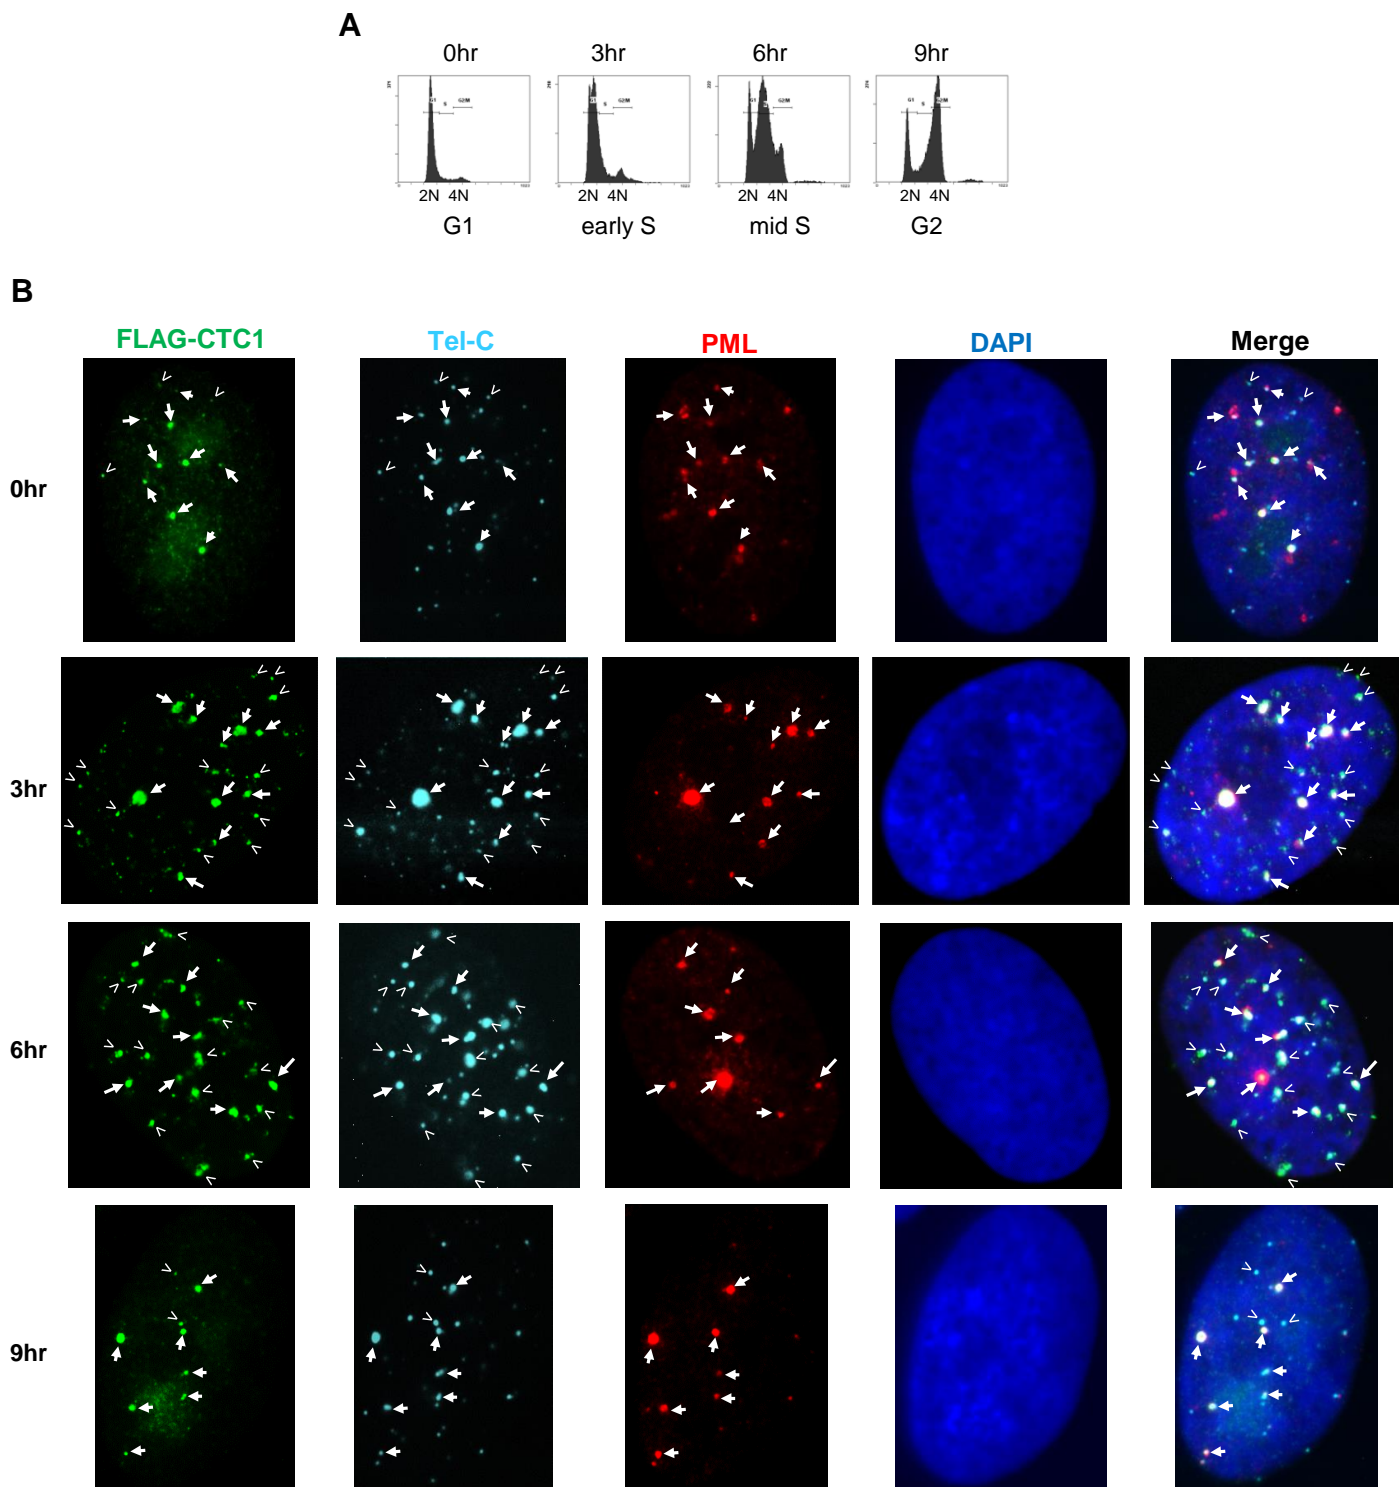

**Supplemental Fig S2. Cell cycle-regulated CTC1 colocalized with telomeres and APBs in U2OS cells.** U2OS cells expressing Flag-CTC1 were synchronized at G1/S boundary with double-thymidine block, and then released to S and G2 phases. **(A)** FACS analysis of DNA content in synchronized U2OS-Flag-CTC1 cells released into S phase. **(B)** IF-FISH images at different stages of the cell cycle. Cells were co-stained with anti-Flag (green), anti-PML (red), and C-rich telomeric PNA probe (teal). Block arrows indicate Flag-CTC1 colocalization with APBs (colocalization with PML and TelC), and arrowheads indicate Flag-CTC1/Tel colocalizations outside PML.
