# Supplementary material
Source: PubMed Central journal article supplement (PMC5551977)
Supplement: NIHMS885857-supplement-FigS3.pdf [file NIHMS885857-supplement-FigS3.pdf]

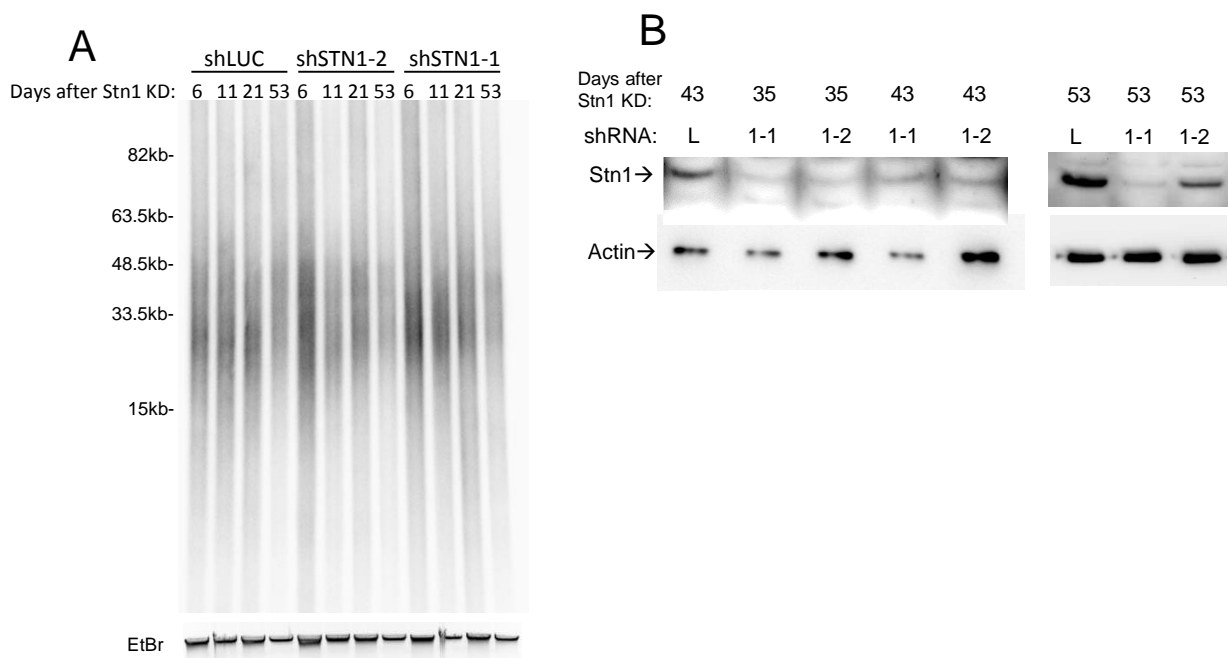

**Supplemental Fig S3. TRF analysis shows unaffected telomere length in U2OS cells with stable STN1 knockdown. (A)** U2OS cells stably expressing shLUC or shSTN1 by retroviral transduction were cultured for 6, 11, 21, 53 days after puromycin selection and then genomic DNA was extracted for TRF analysis. The amount of total DNA loaded in each sample was visualized with ethidium bromide staining. **(B)** Western blot shows STN1 knockdown was maintained in long-term culture. L: shLUC; 1-1: shSTN1-1; 1-2: shSTN1-2.
