# Supplementary material
Source: PubMed Central journal article supplement (PMC5551977)

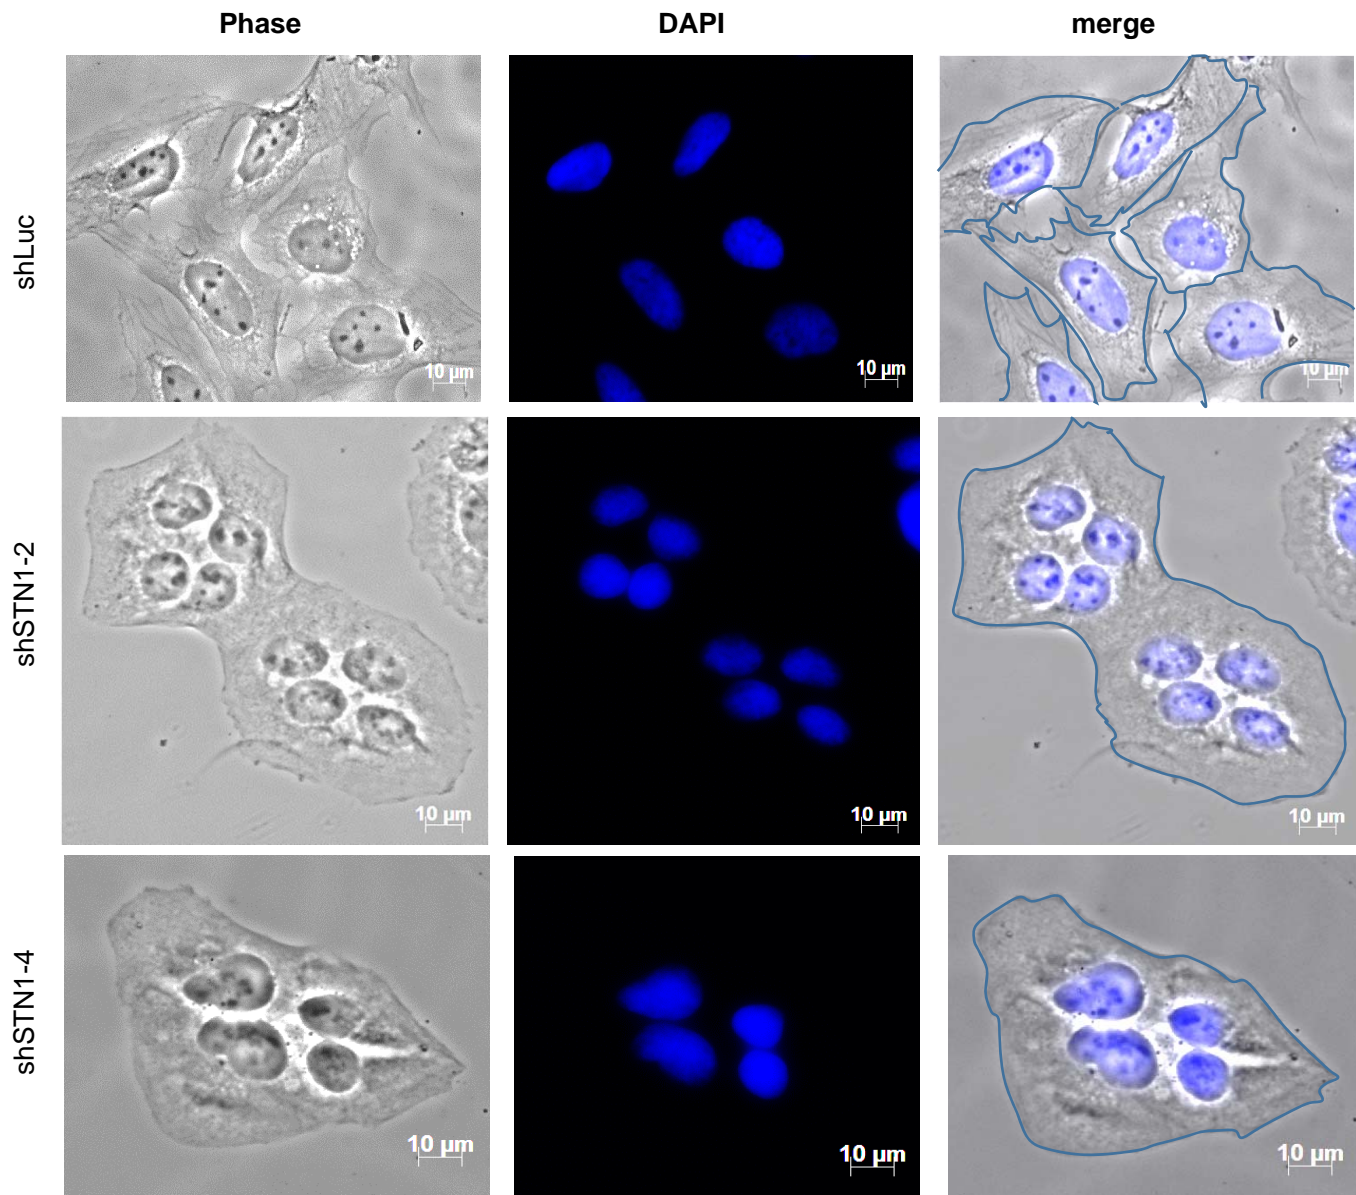

Supplemental Fig S4. Enlarged images of multinucleated cells.

Supplement: NIHMS885857-supplement-FigS4.pdf [file NIHMS885857-supplement-FigS4.pdf]
